# Supplementary material for: Raman mapping of fentanyl transdermal delivery systems with off-label modifications
Source: Royal Society of Chemistry journal article supplement (doi:10.1039/c9an01289c), 2019-12-05
Supplement: c9an01289c1.pdf [file c9an01289c1.pdf]

## Supporting Information

### Raman Mapping of Fentanyl Transdermal Delivery Systems with Off-Label Modifications

Teng Xu<sup>1\*</sup>, Huzeyfe Yilmaz<sup>1\*</sup>, Daniel R. Willett<sup>1‡</sup>, Caroline Strasinger<sup>2</sup>, Jason D. Rodriguez<sup>1</sup>, David Keire<sup>1</sup>, Anna M. Wokovich<sup>1</sup>

<sup>1</sup> Food and Drug Administration (FDA)/Center for Drug Evaluation and Research (CDER)/Office of Pharmaceutical Quality (OPQ)/Office of Testing and Research (OTR)/Division of Pharmaceutical Analysis (DPA), St. Louis, Missouri

<sup>2</sup> FDA/CDER/OPQ/Office of New Drug Products (ONDP), Silver Spring, Maryland

\* These authors contributed equally to this work

‡ E-mail: [daniel.willett@fda.hhs.gov](mailto:daniel.willett@fda.hhs.gov)

## Time lapse study on crystal growth for TDS-4

A time lapse experiment on crystallization was performed on TDS-4. The top image of Figure S1 (a) shows an overall view around the die cutting area of TDS-4 after 1-week aging. The bottom image shows that elongated fentanyl crystals grew from the fresh die cutting edge:  $\langle L \rangle = 75.8 \mu\text{m}$  with length standard deviation  $\delta_L = 47.8 \mu\text{m}$ ;  $\langle W \rangle = 2.4 \mu\text{m}$  with width standard deviation  $\delta_W = 0.6 \mu\text{m}$ . These observations show that fentanyl crystallization can be detected as early as one week after die cutting. Figure S1 (b) are optical images of TDS-4 after aging over 12 months. The top image shows an overview of the long-elongated fentanyl crystal emanating from the die cutting edge with  $\langle L \rangle = 1480.3 \mu\text{m}$  and length standard deviation  $\delta_L = 728.0 \mu\text{m}$ . The broken drug-in-adhesive (DIA) surface near the die cutting edge is due to the crystallization of fentanyl changing the viscoelastic properties of the DIA matrix and leading to the blocking or lock-up (i.e., failure of the release liner to cleanly or easily peeling away from the DIA matrix<sup>1</sup>). The bottom figures show the enlarged images of a fentanyl crystal near the die cutting edge. The  $\langle W \rangle = 22.6 \mu\text{m}$  with width standard deviation  $\delta_W = 3.0 \mu\text{m}$ . Figure S1 (c) and (d) show the effect of aging time on the crystal number and average crystal length grown from the die cutting

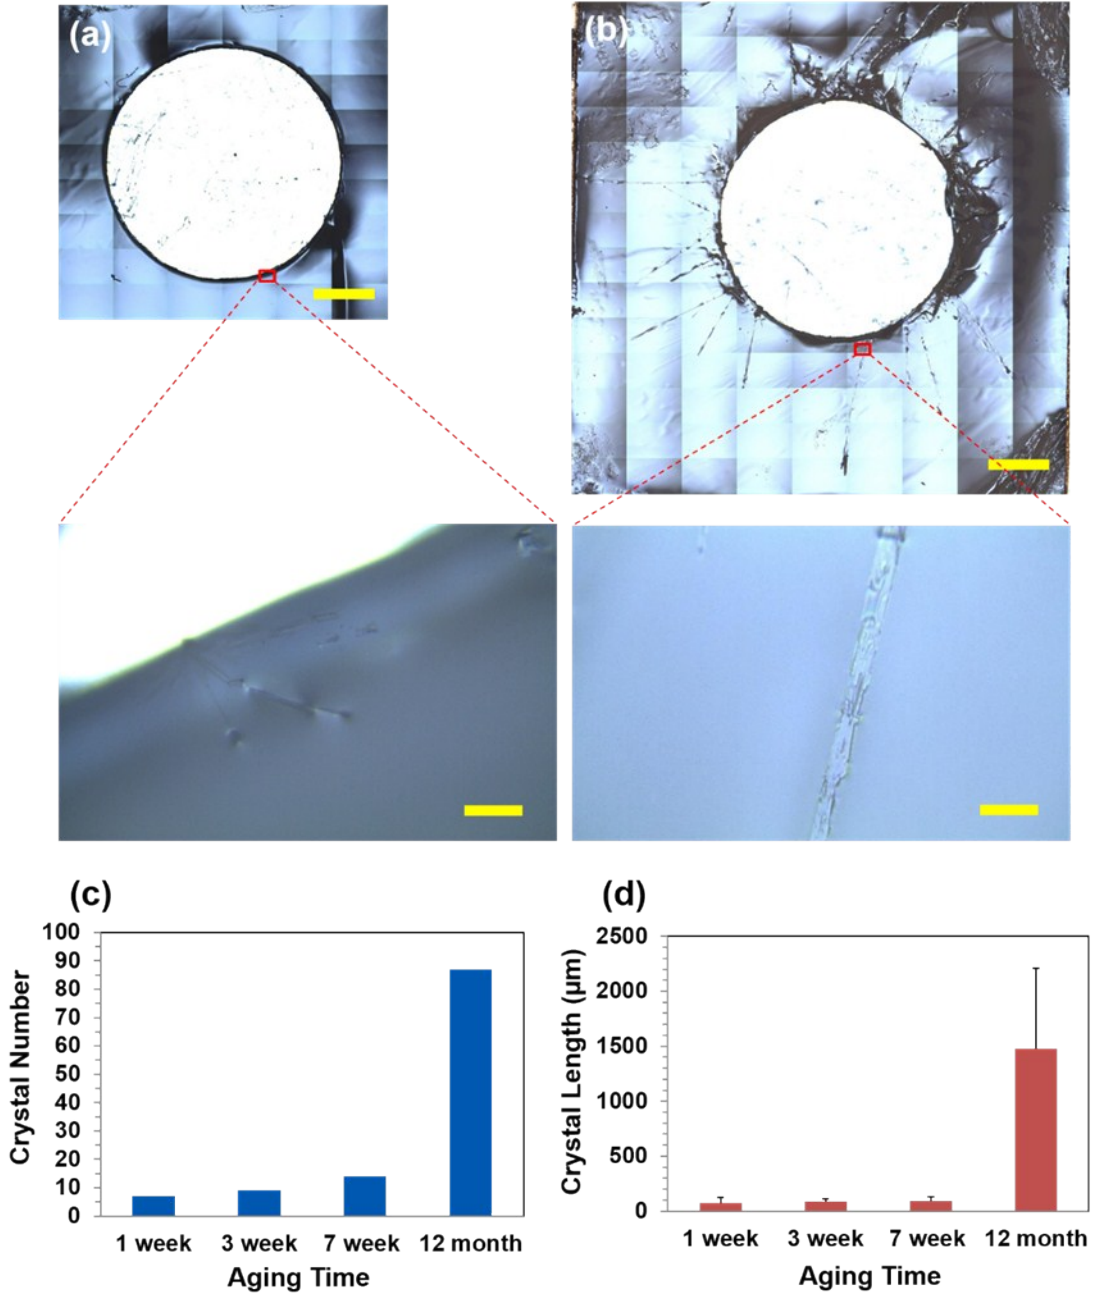

edge.

**Figure S1** (a) Optical image of TDS-4 sample after aged for 1 week; (b) Optical image of TDS-4 sample after aged for more than 12 months. The scale bars for the top images are 2 mm; The scale bars for the bottom images are 50  $\mu\text{m}$ . (c) Effect of aging time on crystal number; (d) Effect of aging time on crystal length.

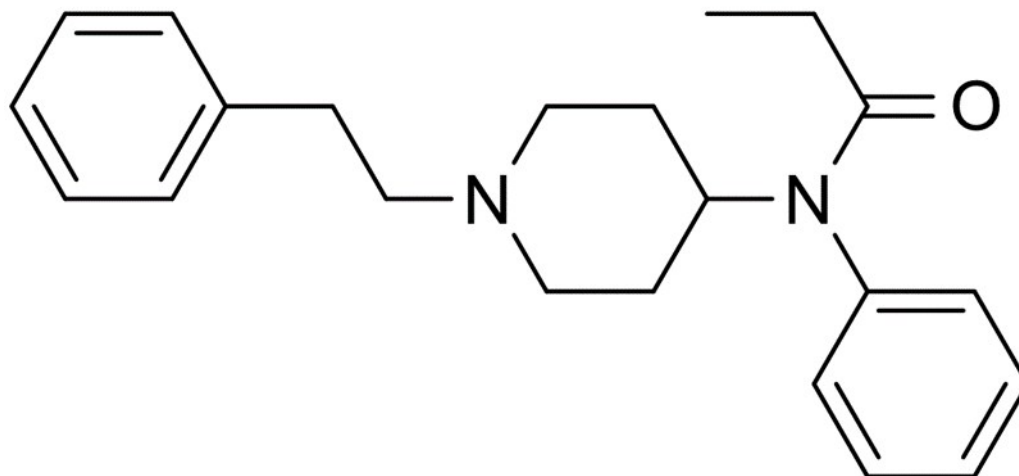

**Figure S2.** Chemical structure of fentanyl. The breathing mode vibration of the aromatic carbon ring at  $1001\text{ cm}^{-1}$  has the largest fentanyl Raman cross section

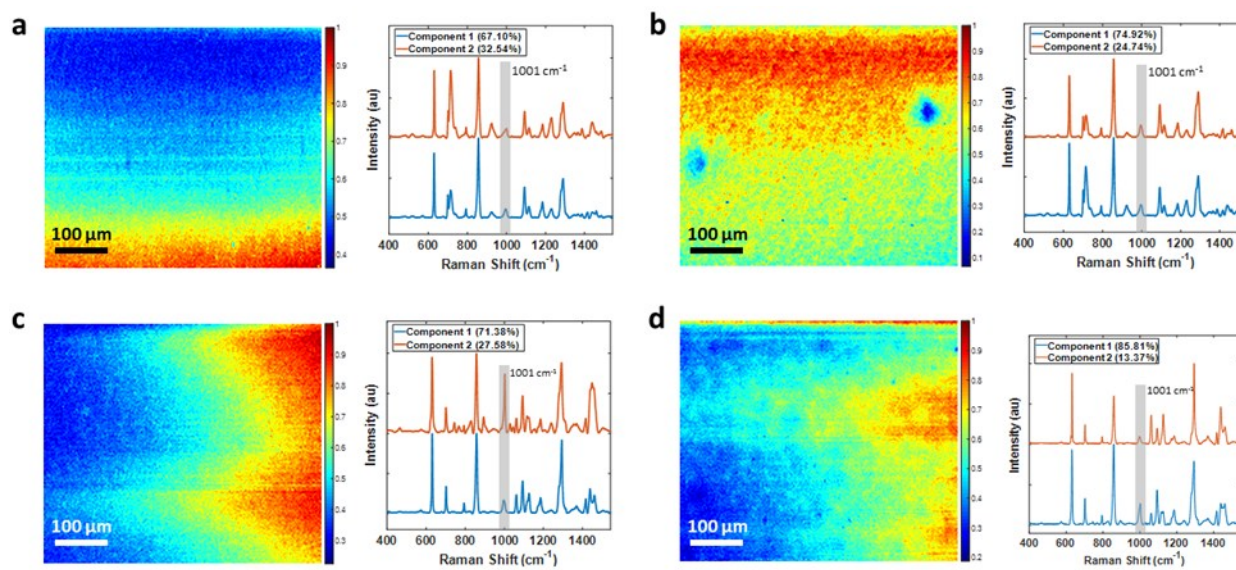

**Figure S3.** Confocal Raman map of the second components (left) and spectra of the two components (right) of unmodified TDS-1 (a), die-cut and aged TDS-1 (b), unmodified TDS-2 (c) and die-cut and aged TDS-2 (d). Scale bars are  $100\text{ }\mu\text{m}$ .

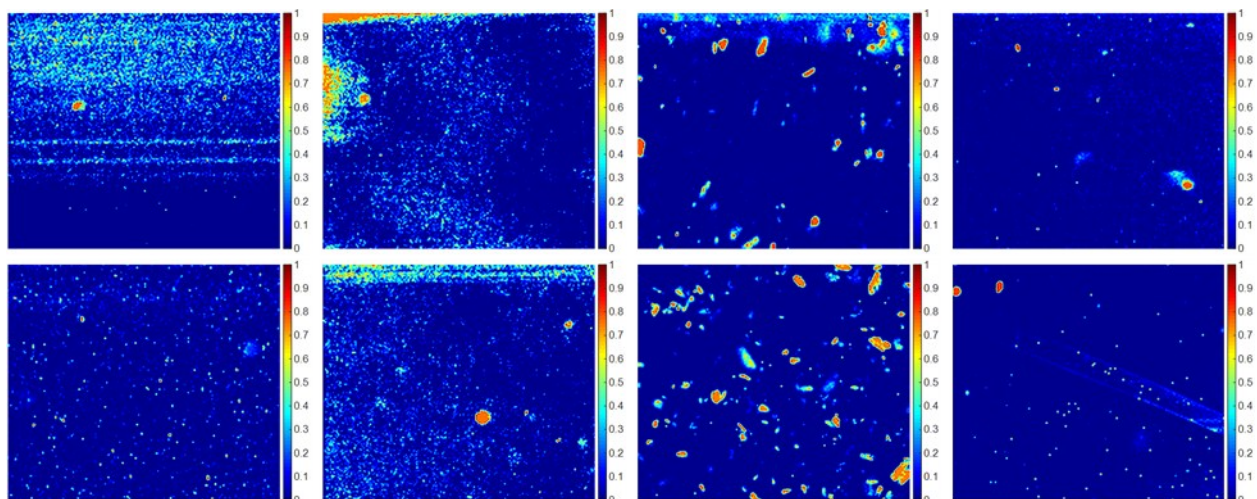

**Figure S4.** MCR-ALS Residuals of confocal Raman maps of unmodified (top) and die-cut and aged (bottom) TDS-1, TDS-2, TDS-3 and TDS-4 from left to right.

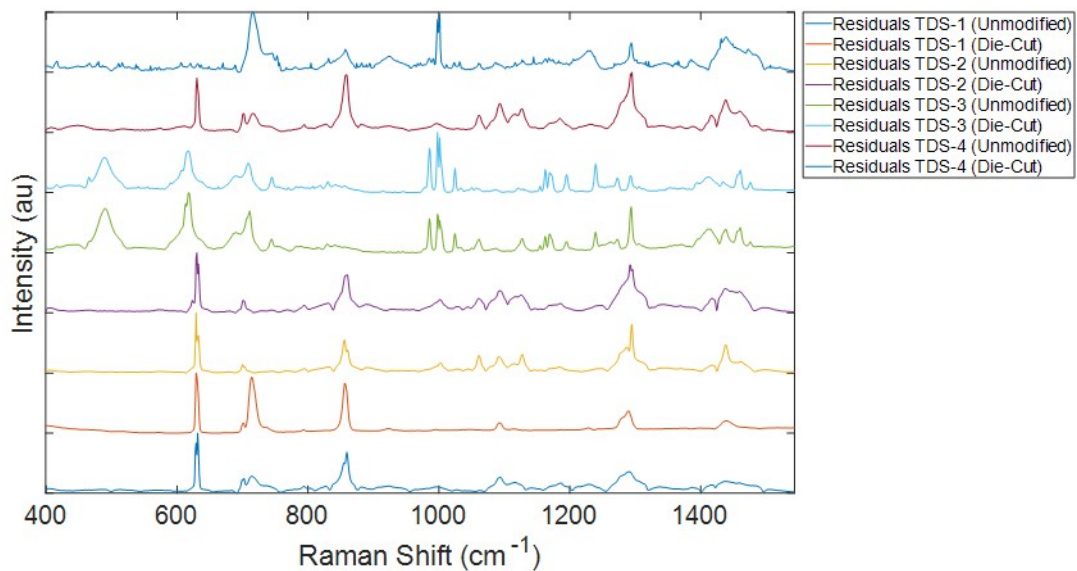

**Figure S5.** Spectra of the MCR-ALS residuals of all TDS samples.

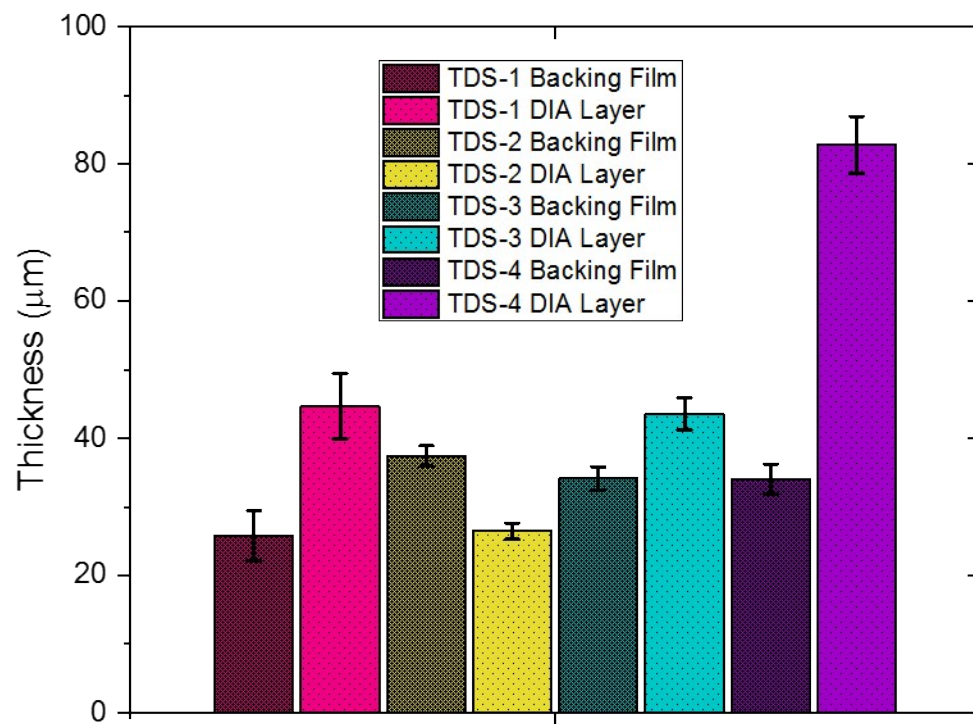

**Figure S6.** Thickness of the backing films and DIA layers of TDS samples measured using depth profiling via a Keyence high-accuracy digital microscope.

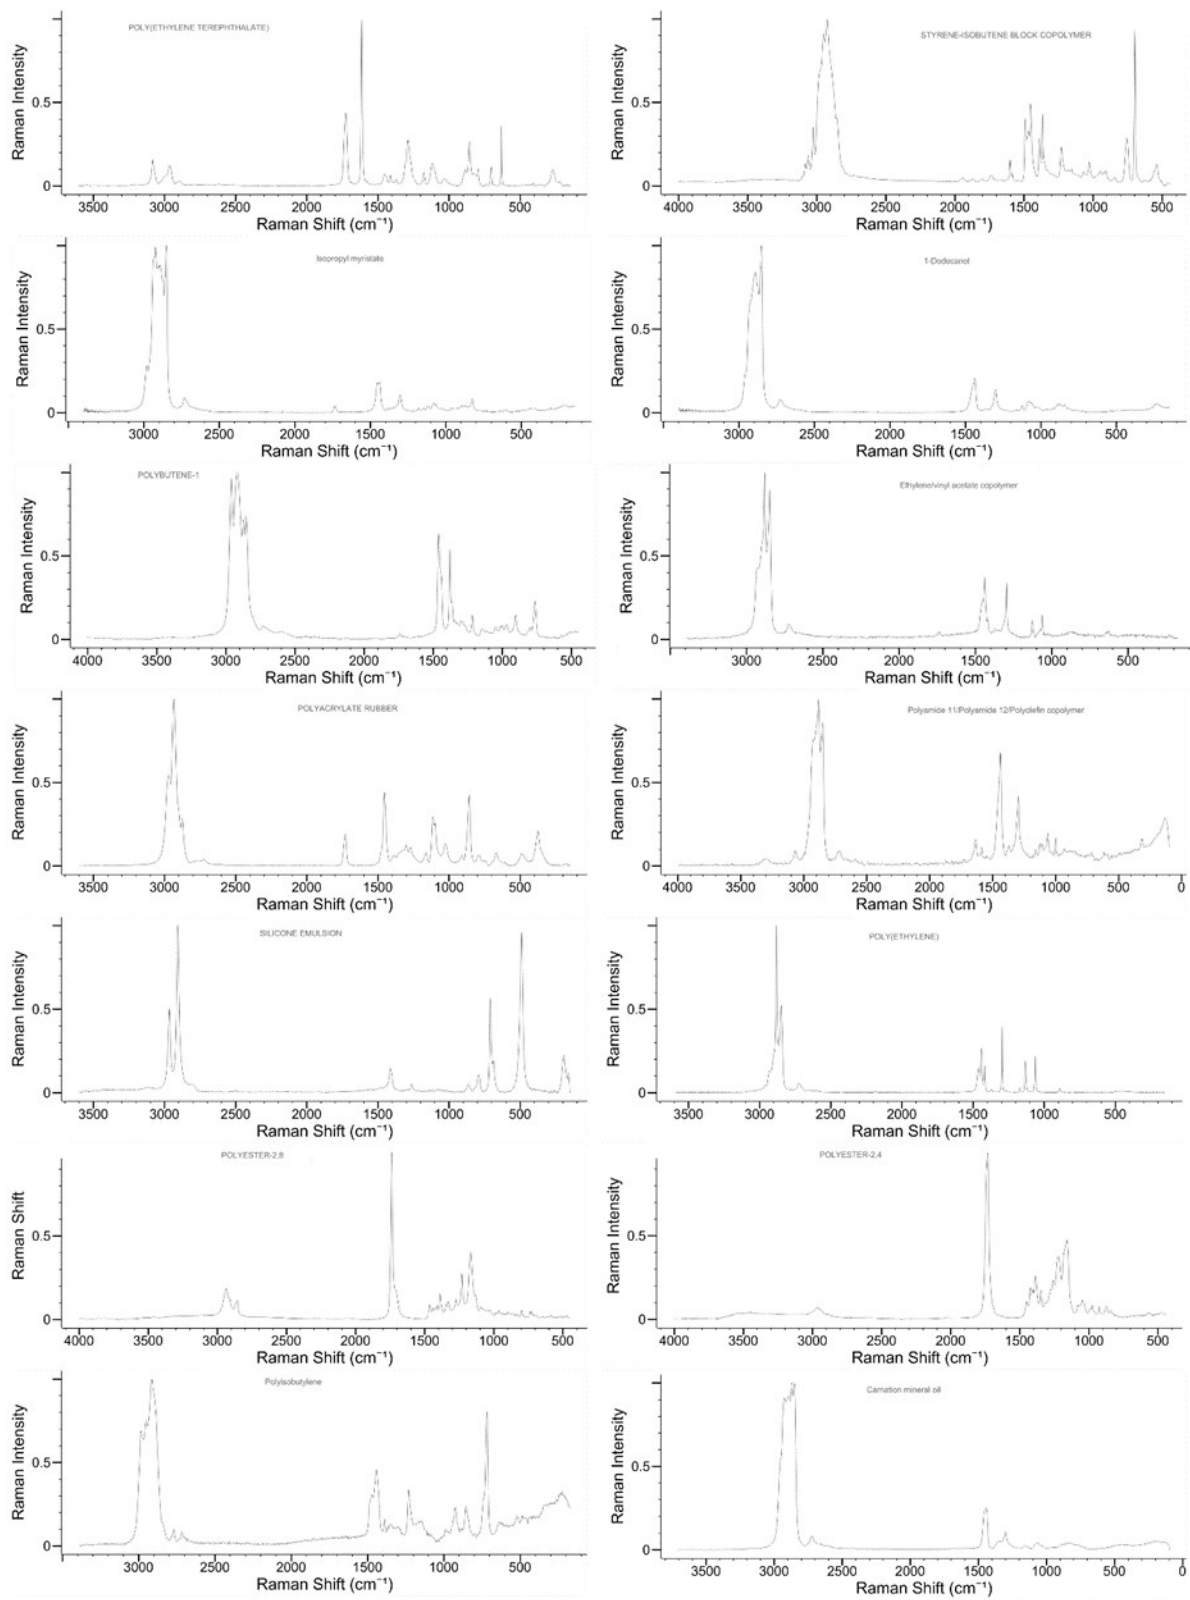

**Figure S7.** Raman spectra of inactive ingredients found in TDS samples.

## **References**

1. *Transdermal and Topical Drug Delivery Principles and Practice*. John Wiley & Sons, Inc.: Hoboken, New Jersey, 2012.
